# Supplementary material for: Spatiotemporal clustering analysis of Expanded Program on Immunization (EPI) vaccination coverage in Pakistan
Source: PubMed Central journal article supplement (PMC7335212; doi:10.1038/s41598-020-67839-0), 2020-07-03

# Spatiotemporal clustering analysis of Expanded Program on Immunization (EPI) vaccination coverage in Pakistan

**Muhammad Farooq Umer**<sup>1,2</sup>, **Shumaila Zofeen**<sup>1</sup> **Wenbiao Hu**<sup>3</sup>, **Xin Qi**<sup>1,4,\*</sup> and **Guihua Zhuang**<sup>1,\*</sup>

<sup>1</sup> School of Public Health, Xi'an Jiaotong University Health Science Center, Xi'an 710061, China; rafooq@hotmail.com (M.F.U.); shumailazofeen@yahoo.com (S.Z.)

<sup>2</sup> Contech International Health Consultant, 2-G, Model Town, Lahore 54700, Pakistan

<sup>3</sup> School of Public Health and Social Work, Queensland University of Technology, Kelvin Grove, QLD 4059, Australia; w2.hu@qut.edu.au

<sup>4</sup> Global Health Institute, Xi'an Jiaotong University Health Science Center, Xi'an 710061, China

\* Correspondence: chestertsee@outlook.com (X.Q.); zhuanggh@mail.xjtu.edu.cn (G.Z.);

Tel.: +86-29-8265-5108 (X.Q.); Tel.: +86-29-8265-5103 (G.Z.)

**PROVINCE**

-  Azad Kashmir
-  Balochistan
-  Disputed Territory
-  Fata
-  Federal Capital Territory
-  Gilgit Baltistan
-  Khyber Pakhtunkhwa
-  Punjab
-  Sindh

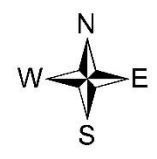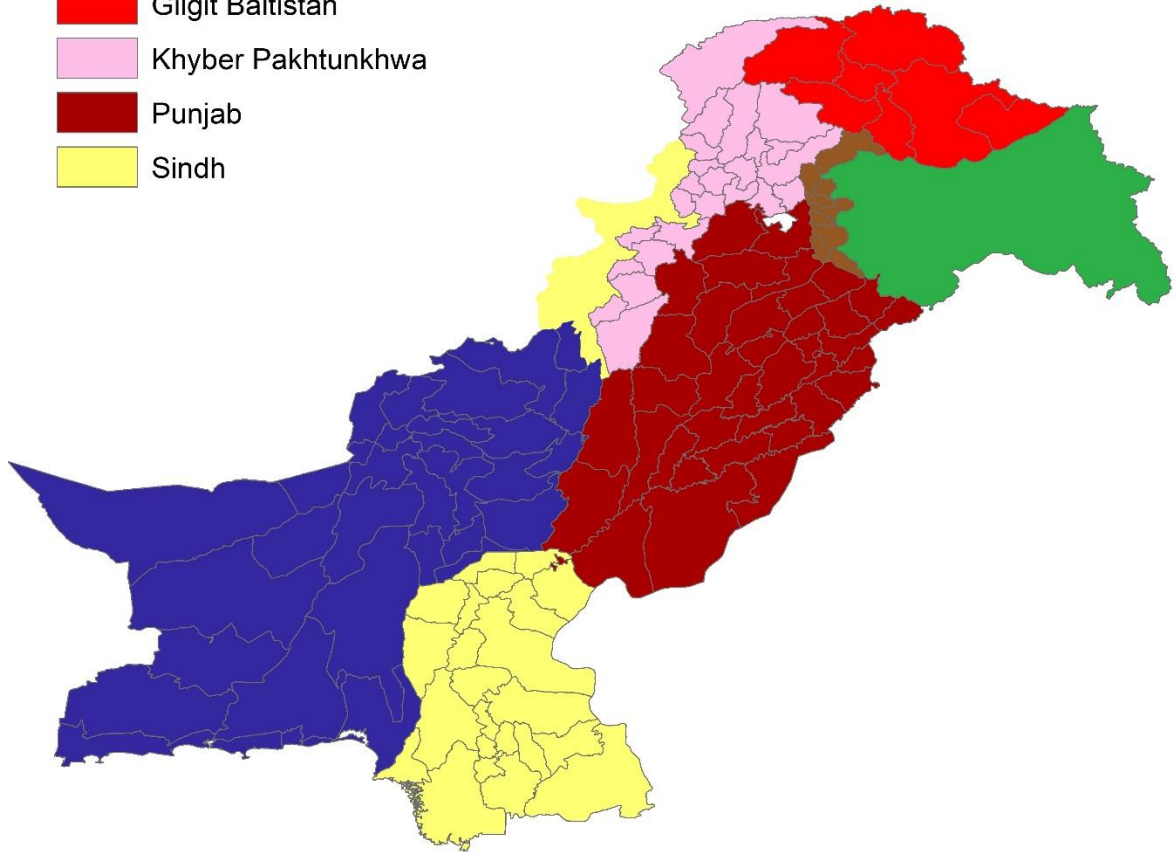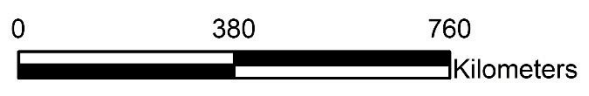

Supplement: 41598_2020_67839_MOESM1_ESM.pdf [file 41598_2020_67839_MOESM1_ESM.pdf]
